# Supplementary material
Source: PubMed Central journal article supplement (PMC5649381)
Supplement: NIHMS911093-supplement-supplement_1.pdf [file NIHMS911093-supplement-supplement_1.pdf]

**Supplemental Table 1.** National drug codes used to identify pharmacy claims for medications.

| Medication    | National Drug Codes                                                                                                                                                                                                                                                                                                                                                                                                                                                                                                                                                                                                                                                                                                                                                                                                                                                                                                                                                                                                                                                                                                                                                                                                                                                                                                                                                                                                                                                                                                                                                                                                                                                                                                                                                                                                                                                                                                                                                                                                                                                                                                                                          |
|---------------|--------------------------------------------------------------------------------------------------------------------------------------------------------------------------------------------------------------------------------------------------------------------------------------------------------------------------------------------------------------------------------------------------------------------------------------------------------------------------------------------------------------------------------------------------------------------------------------------------------------------------------------------------------------------------------------------------------------------------------------------------------------------------------------------------------------------------------------------------------------------------------------------------------------------------------------------------------------------------------------------------------------------------------------------------------------------------------------------------------------------------------------------------------------------------------------------------------------------------------------------------------------------------------------------------------------------------------------------------------------------------------------------------------------------------------------------------------------------------------------------------------------------------------------------------------------------------------------------------------------------------------------------------------------------------------------------------------------------------------------------------------------------------------------------------------------------------------------------------------------------------------------------------------------------------------------------------------------------------------------------------------------------------------------------------------------------------------------------------------------------------------------------------------------|
| Buprenorphine | 149075701, 12496075701, 12496075705, 54569141600, 54569141601, 54017613, 93537856, 228315603, 378092393, 12496127802, 35356055530, 49999063830, 50383092493, 68308020230, 54017713, 93537956, 228315303, 378092493, 12496131002, 35356055630, 49999063930, 50383093093, 63874117303, 68308020830, 74201201, 74201232, 409201232, 21695051510, 38779088800, 38779088801, 38779088803, 38779088806, 38779088809, 49452129201, 49452129202, 49452129203, 49452825301, 49452825302, 49452825303, 51552076501, 51552076502, 51552076505, 51552076506, 51552076509, 51552076510, 51552076550, 51927101200, 62991158301, 62991158302, 62991158303, 62991158304, 62991158306, 62991158307, 62991158308, 63275992201, 63275992202, 63275992203, 63275992204, 63275992205, 63275992207, 63370090506, 63370090509, 63370090510, 63370090515, 54018813, 93572056, 228315403, 228315473, 406192303, 12496128302, 16590066630, 42291017430, 49999039507, 49999039515, 49999039530, 50383029493, 52959074930, 54569549600, 54868575000, 55700018430, 63629402801, 63874108503, 65162041603, 68071151003, 68258299903, 54018913, 93572156, 228315503, 228315573, 406192403, 12496130602, 35356000407, 35356000430, 42291017530, 43063018407, 43063018430, 50383028793, 52959030430, 54569573900, 54569573901, 54569573902, 54569640800, 54868570700, 54868570701, 54868570702, 54868570703, 54868570704, 55045378403, 63629403401, 63629403402, 63629403403, 63874108403, 65162041503, 66336001630, 68071138003, 40042001001, 42023017901, 42023017905, 55390010010, 35356060704, 59011075004, 35356060504, 54569632500, 59011075104, 35356060604, 54569632600, 59011075204, 12496120201, 12496120203, 12496120801, 12496120803, 54569639900, 55700014730, 12496120401, 12496120403, 12496121201, 12496121203, 54123091430, 54123095730, 59011075804, 59385001201, 59385001230, 59385001401, 59385001430, 59385001601, 59385001630, 59011075704, 54123098630, 54123011430, 54123092930, 63481016101, 63481016160, 63481020701, 63481020760, 63481034801, 63481034860, 63481051901, 63481051960, 63481068501, 63481068560, 63481082001, 63481082060, 63481095201, 63481095260 |
| Naltrexone    | 56001122, 56001130, 56001170, 56007950, 56008050, 185003901, 185003930, 406009201, 406009203, 406117001, 406117003, 555090201, 555090202, 16729008101, 16729008110, 42291063230, 43063059115, 47335032683, 47335032688, 50436010501, 51224020630, 51224020650, 51285027501, 51285027502, 52152010502, 52152010504, 52152010530, 54868557400, 65694010003, 65694010010, 68084029111, 68084029121, 68094085362, 68115068030, 49452483501, 51927275300, 51927360200, 51927354800, 63459030042, 65757030001, 65757030202, 38779088703, 38779088704, 38779088705, 38779088706, 38779088708, 49452480801, 49452480802, 49452483502, 51552073701, 51552073702, 51552073704, 51927437700, 52372075101, 52372075102, 52372075103, 55812033301, 55812033302, 55812033303, 63370015810, 63370015815, 63370015825, 63370015835, 63370015845, 60966014404, 60966024403, 60966034402, 62991124301, 62991124302, 62991124303, 62991124304                                                                                                                                                                                                                                                                                                                                                                                                                                                                                                                                                                                                                                                                                                                                                                                                                                                                                                                                                                                                                                                                                                                                                                                                                                   |

**Supplemental Table 2.** Sociodemographic characteristics of 23,312 youth with opioid use disorder and odds ratios (OR) for receipt of a medication (buprenorphine or naltrexone) within 3 months of diagnosis: Optum, January 1, 2001 to December 31, 2014.

| Characteristic <sup>a</sup>                       | Received Medication (n = 5,580), % | Unadjusted OR (95% CI) | Adjusted <sup>b</sup> Probability of Receiving Medication, % (95% CI) | Adjusted <sup>b</sup> OR (95% CI) |
|---------------------------------------------------|------------------------------------|------------------------|-----------------------------------------------------------------------|-----------------------------------|
| <b>Age of diagnosis</b>                           |                                    |                        |                                                                       |                                   |
| 21-25 years (n = 12,577)                          | 32.9                               | Reference              | 30.3 (29.4 – 31.2)                                                    | Reference                         |
| 18-20 years (n = 7,929)                           | 24.1                               | 0.65 (0.61 – 0.69)     | 22.0 (21.0 – 23.0)                                                    | 0.65 (0.61 – 0.69)                |
| 16-17 years (n = 2,093)                           | 10.3                               | 0.24 (0.20 – 0.27)     | 10.0 (8.7 – 11.3)                                                     | 0.26 (0.22 – 0.30)                |
| 13-15 years (n = 713)                             | 1.7                                | 0.03 (0.02 – 0.06)     | 1.6 (0.6 – 2.6)                                                       | 0.04 (0.02 – 0.07)                |
| <b>Sex</b>                                        |                                    |                        |                                                                       |                                   |
| Male (n = 15,325)                                 | 28.8                               | Reference              | 24.6 (23.8 – 25.4)                                                    | Reference                         |
| Female (n = 7,987)                                | 23.2                               | 0.75 (0.70 – 0.80)     | 20.5 (19.5 – 21.5)                                                    | 0.79 (0.74 – 0.84)                |
| <b>Race/ethnicity<sup>c</sup></b>                 |                                    |                        |                                                                       |                                   |
| White non-Hispanic (n = 19,177)                   | 27.2                               | Reference              | 23.3 (22.6 – 24.1)                                                    | Reference                         |
| Black non-Hispanic (n = 117)                      | 21.4                               | 0.73 (0.47 – 1.13)     | 17.4 (10.5 – 24.3)                                                    | 0.69 (0.43 – 1.12)                |
| Hispanic (n = 1,277)                              | 23.5                               | 0.82 (0.71 – 0.94)     | 20.1 (17.8 – 22.3)                                                    | 0.84 (0.71 – 0.95)                |
| Asian (n = 249)                                   | 25.3                               | 0.91 (0.68 – 1.21)     | 20.4 (15.5 – 25.2)                                                    | 0.84 (0.62 – 1.14)                |
| Mixed (n = 2,453)                                 | 26.8                               | 0.98 (0.89 – 1.08)     | 23.9 (22.0 – 25.7)                                                    | 1.03 (0.93 – 1.15)                |
| <b>Metropolitan area</b>                          |                                    |                        |                                                                       |                                   |
| Metropolitan (n = 15,191)                         | 26.5                               | Reference              | 23.0 (22.2 – 23.8)                                                    | Reference                         |
| Non-metropolitan (n = 7,350)                      | 27.6                               | 1.05 (0.99 – 1.12)     | 23.3 (22.3 – 24.4)                                                    | 1.02 (0.95 – 1.09)                |
| <b>Neighborhood educational level<sup>d</sup></b> |                                    |                        |                                                                       |                                   |
| High (n = 15,581)                                 | 26.9                               | Reference              | 23.0 (22.2 – 23.9)                                                    | Reference                         |
| High-middle (n = 4,709)                           | 27.8                               | 1.04 (0.97 – 1.12)     | 23.9 (22.6 – 25.3)                                                    | 1.05 (0.97 – 1.14)                |
| Low-middle (n = 2,405)                            | 25.5                               | 0.93 (0.84 – 1.02)     | 22.6 (20.7 – 24.6)                                                    | 0.98 (0.87 – 1.10)                |
| Low (n = 594)                                     | 26.9                               | 0.89 (0.74 – 1.08)     | 21.6 (17.8 – 25.4)                                                    | 0.92 (0.73 – 1.16)                |
| <b>Neighborhood poverty level<sup>e</sup></b>     |                                    |                        |                                                                       |                                   |
| Low (n = 12,464)                                  | 27.6                               | Reference              | 23.9 (22.9 – 24.8)                                                    | Reference                         |
| Low-middle (n = 5,828)                            | 25.9                               | 0.92 (0.85 – 0.98)     | 22.1 (20.9 – 23.2)                                                    | 0.90 (0.84 – 0.98)                |
| High-middle (n = 3,663)                           | 25.7                               | 0.91 (0.84 – 0.99)     | 22.1 (20.6 – 23.7)                                                    | 0.91 (0.82 – 1.01)                |
| High (n = 1,334)                                  | 27.4                               | 0.99 (0.87 – 1.12)     | 24.0 (21.1 – 26.8)                                                    | 1.00 (0.85 – 1.19)                |
| <b>Census region</b>                              |                                    |                        |                                                                       |                                   |
| South (n = 9,673)                                 | 27.3                               | Reference              | 23.2 (22.2 – 24.1)                                                    | Reference                         |
| Midwest (n = 6,145)                               | 26.8                               | 0.98 (0.91 – 1.05)     | 23.9 (22.7 – 25.1)                                                    | 1.04 (0.97 – 1.13)                |
| West (n = 4,036)                                  | 27.0                               | 0.99 (0.91 – 1.07)     | 22.8 (21.4 – 24.2)                                                    | 0.98 (0.90 – 1.07)                |
| Northeast (n = 3,454)                             | 25.9                               | 0.94 (0.86 – 1.02)     | 22.1 (20.7 – 23.6)                                                    | 0.94 (0.86 – 1.04)                |

- Where counts do not add to total, data are missing
- Adjusted for all other covariates listed in the table in addition to year that an individual was diagnosed with opioid use disorder (coded as an indicator variable)
- Race/ethnicity data were derived from a combination of geocoded census-block group-level race from the 2000 US Census and surname analysis to identify Asian and Hispanic individuals; mixed neighborhoods are those that did not meet a 75% threshold for white, black, or Hispanic ethnicity
- Neighborhood educational level was based on geocoded census block group-level data from the 2000 US Census; High education level denotes neighborhoods with less than 15% of individuals with less than high school education; high-middle, 15% to 24.9%; low-middle, 25% to 39.9%; and low, 40% or more of individuals<sup>33</sup>

e. Neighborhood poverty was based on geocoded census block group-level data from the 2000 US Census; Low denotes neighborhoods with less than 5% of individuals living below the poverty level; low-middle, 5% to 9.9%; high-middle, 10% to 19.9%; and high, 20% or more

**Supplemental Table 3.** Sociodemographic characteristics of 15,824 youth with opioid use disorder and odds ratios (OR) for receipt of a medication (buprenorphine or naltrexone) within 12 months of diagnosis: Optum, January 1, 2001 to December 31, 2014.

| Characteristic <sup>a</sup>                       | Received Medication (n = 5,580), % | Unadjusted OR (95% CI) | Adjusted <sup>b</sup> Probability of Receiving Medication, % (95% CI) | Adjusted <sup>b</sup> OR (95% CI) |
|---------------------------------------------------|------------------------------------|------------------------|-----------------------------------------------------------------------|-----------------------------------|
| <b>Age of diagnosis</b>                           |                                    |                        |                                                                       |                                   |
| 21-25 years (n = 8,122)                           | 32.8                               | Reference              | 30.0 (28.9 – 31.1)                                                    | Reference                         |
| 18-20 years (n = 5,622)                           | 24.2                               | 0.66 (0.61 – 0.71)     | 22.1 (21.0 – 23.3)                                                    | 0.66 (0.61 – 0.72)                |
| 16-17 years (n = 1,550)                           | 10.5                               | 0.24 (0.20 – 0.28)     | 10.3 (8.8 – 11.9)                                                     | 0.27 (0.23 – 0.32)                |
| 13-15 years (n = 530)                             | 1.5                                | 0.03 (0.02 – 0.06)     | 1.6 (0.4 – 2.7)                                                       | 0.04 (0.02 – 0.08)                |
| <b>Sex</b>                                        |                                    |                        |                                                                       |                                   |
| Male (n = 10,483)                                 | 28.5                               | Reference              | 24.2 (23.1 – 25.1)                                                    | Reference                         |
| Female (n = 5,341)                                | 22.6                               | 0.73 (0.68 – 0.79)     | 19.8 (18.6 – 21.0)                                                    | 0.78 (0.72 – 0.84)                |
| <b>Race/ethnicity<sup>c</sup></b>                 |                                    |                        |                                                                       |                                   |
| White non-Hispanic (n = 13,005)                   | 26.9                               | Reference              | 22.8 (21.9 – 23.7)                                                    | Reference                         |
| Black non-Hispanic (n = 74)                       | 17.5                               | 0.58 (0.32 – 1.06)     | 13.5 (5.7 – 21.4)                                                     | 0.53 (0.27 – 1.04)                |
| Hispanic (n = 909)                                | 23.3                               | 0.83 (0.71 – 0.97)     | 20.5 (17.8 – 23.3)                                                    | 0.87 (0.74 – 1.04)                |
| Asian (n = 174)                                   | 23.0                               | 0.81 (0.57 – 1.16)     | 18.9 (13.2 – 24.5)                                                    | 0.79 (0.54 – 1.14)                |
| Mixed (n = 1,636)                                 | 26.3                               | 0.97 (0.35 – 1.09)     | 23.3 (21.0 – 25.6)                                                    | 1.03 (0.90 – 1.17)                |
| <b>Metropolitan area</b>                          |                                    |                        |                                                                       |                                   |
| Metropolitan (n = 10,494)                         | 26.2                               | Reference              | 22.6 (21.6 – 23.6)                                                    | Reference                         |
| Non-metropolitan (n = 4,788)                      | 27.1                               | 1.04 (0.97 – 1.13)     | 22.8 (21.4 – 24.1)                                                    | 1.01 (0.93 – 1.10)                |
| <b>Neighborhood educational level<sup>d</sup></b> |                                    |                        |                                                                       |                                   |
| High (n = 10,829)                                 | 26.5                               | Reference              | 22.3 (21.3 – 23.3)                                                    | Reference                         |
| High-middle (n = 3,063)                           | 27.8                               | 1.07 (0.98 – 1.17)     | 24.1 (22.4 – 25.8)                                                    | 1.11 (1.00 – 1.22)                |
| Low-middle (n = 1,551)                            | 25.3                               | 0.94 (0.83 – 1.06)     | 23.2 (20.7 – 25.7)                                                    | 1.05 (0.91 – 1.22)                |
| Low (n = 367)                                     | 22.1                               | 0.83 (0.61 – 1.01)     | 18.9 (14.4 – 23.5)                                                    | 0.81 (0.60 – 1.10)                |
| <b>Neighborhood poverty level<sup>e</sup></b>     |                                    |                        |                                                                       |                                   |
| Low (n = 8,673)                                   | 27.5                               | Reference              | 23.7 (22.5 – 24.8)                                                    | Reference                         |
| Low-middle (n = 3,934)                            | 25.6                               | 0.91 (0.83 – 0.99)     | 21.5 (20.1 – 22.9)                                                    | 0.88 (0.80 – 0.97)                |
| High-middle (n = 2,363)                           | 24.7                               | 0.87 (0.78 – 0.96)     | 20.9 (19.0 – 22.7)                                                    | 0.85 (0.75 – 0.97)                |
| High (n = 840)                                    | 26.2                               | 0.94 (0.80 – 1.10)     | 22.8 (19.3 – 26.3)                                                    | 0.95 (0.77 – 1.18)                |
| <b>Census region</b>                              |                                    |                        |                                                                       |                                   |
| South (n = 6,625)                                 | 26.8                               | Reference              | 22.5 (21.3 – 23.6)                                                    | Reference                         |
| Midwest (n = 4,171)                               | 26.4                               | 0.98 (0.90 – 1.07)     | 23.5 (22.1 – 24.9)                                                    | 1.06 (0.96 – 1.16)                |
| West (n = 2,756)                                  | 26.6                               | 0.99 (0.90 – 1.10)     | 22.7 (21.0 – 24.4)                                                    | 1.01 (0.91 – 1.13)                |
| Northeast (n = 2,270)                             | 25.8                               | 0.95 (0.85 – 1.06)     | 21.5 (19.7 – 23.3)                                                    | 0.94 (0.84 – 1.06)                |

- Where counts do not add to total, data are missing
- Adjusted for all other covariates listed in the table in addition to year that an individual was diagnosed with opioid use disorder (coded as an indicator variable)
- Race/ethnicity data were derived from a combination of geocoded census-block group-level race from the 2000 US Census and surname analysis to identify Asian and Hispanic individuals; mixed neighborhoods are those that did not meet a 75% threshold for white, black, or Hispanic ethnicity
- Neighborhood educational level was based on geocoded census block group-level data from the 2000 US Census; High education level denotes neighborhoods with less than 15% of individuals with less than high school education; high-middle, 15% to 24.9%; low-middle, 25% to 39.9%; and low, 40% or more of individuals<sup>33</sup>

e. Neighborhood poverty was based on geocoded census block group-level data from the 2000 US Census; Low denotes neighborhoods with less than 5% of individuals living below the poverty level; low-middle, 5% to 9.9%; high-middle, 10% to 19.9%; and high, 20% or more
